# Supplementary material
Source: publisher site journal article supplement (https://www.dovepress.com/article/478065)
Supplement: Supplementary file 1 [file get_supplementary_file.php]

**Supplementary File**

**Table S1: Haematological Markers of cases reported**

| Date | Tmax | WBC | Neutrophils | Hb | PLT | CRP | Ret | Ret% | PCT | LAC | IL-2 | IL-4 | IL-6 | IL-10 | TNF-a | IFN-r | PRO | LDH | IgG | IgM | IgA | C3 | C4 |
| --- | --- | --- | --- | --- | --- | --- | --- | --- | --- | --- | --- | --- | --- | --- | --- | --- | --- | --- | --- | --- | --- | --- | --- |
| 11-08-2023 | 36.8 | 1.98 | 0.54 | 73 | 58 | 5.2 |  |  |  |  |  |  |  |  |  |  |  |  |  |  |  |  |  |
| 12-08-2023 | 36.7 |  |  |  |  | 6.3 |  |  |  |  |  |  |  |  |  |  |  |  |  |  |  |  |  |
| 13-08-2023 | 36.6 | 2.01 | 0.67 | 72 | 58 | 5.3 |  |  |  |  |  |  |  |  |  |  |  |  |  |  |  |  |  |
| 14-08-2023 | 36.7 | 2.34 | 0.88 | 75 | 77 | 4.8 |  |  |  |  |  |  |  |  |  |  |  |  |  |  |  |  |  |
| 15-08-2023 | 36.6 | 2.74 | 1.1 | 76 | 105 | 3.4 |  |  |  |  |  |  |  |  |  |  |  |  |  |  |  |  |  |
| 16-08-2023 | 37.9 | 2.3 | 2.11 | 72 | 134 | 5.1 |  |  | 0.1 |  |  |  |  |  |  |  | 34 |  |  |  |  |  |  |
| 17-08-2023 | 39.9 | 0.98 | 0.97 | 58 | 54 | 17.4 |  |  |  | 1.4 | 1.29 | 1.72 | 15.91 | 2.03 | 3.84 | 2.8 | 24.6 |  |  |  |  |  |  |
| 18-08-2023 | 36.9 | 1.56 | 1.55 | 87 | 58 | 75.4 |  |  |  | 2.1 |  |  |  |  |  |  | 34.5 |  |  |  |  |  |  |
| 19-08-2023 | 36.8 | 0.64 | 0.62 | 104 | 61 | 23.6 |  |  |  |  |  |  |  |  |  |  |  | 258 |  |  |  |  |  |
| 20-08-2023 | 37.8 | 0.16 | 0.15 | 100 | 46 | 6.6 |  |  | 0.3 |  |  |  |  |  |  |  | 39.5 |  |  |  |  |  |  |
| 21-08-2023 | 36.9 | 0.02 | 0.06 | 96 | 24 | 31.3 |  |  |  |  | 0.64 | 1.12 | 264.04 | 2.04 | 1.92 | 1.27 |  |  |  |  |  |  |  |
| 22-08-2023 | 36.7 | 0.01 | 0 | 94 | 15 | 87.6 |  |  |  |  |  |  |  |  |  |  |  |  |  |  |  |  |  |
| 23-08-2023 | 36.6 | 0.03 | 0 | 84 | 55 | 36.5 |  |  |  |  |  |  |  |  |  |  |  |  |  |  |  |  |  |
| 24-08-2023 | 36.9 | 0.01 | 0 | 82 | 38 | 12.3 |  |  |  |  |  |  |  |  |  |  |  |  |  |  |  |  |  |
| 25-08-2023 | 36.7 | 0.01 | 0 | 83 | 31 | 12.7 |  |  |  |  |  |  |  |  |  |  |  |  |  |  |  |  |  |
| 26-08-2023 | 36.7 | 0.01 | 0 | 77 | 20 | 13.3 |  |  |  |  |  |  |  |  |  |  |  |  |  |  |  |  |  |
| 27-08-2023 | 36.8 | 0.02 | 0 | 67 | 14 | 18.1 |  |  |  |  |  |  |  |  |  |  |  |  |  |  |  |  |  |
| 28-08-2023 | 36.7 | 0.04 | 0 | 76 | 52 | 33.8 |  |  |  |  |  |  |  |  |  |  | 43.4 | 152 |  |  |  |  |  |
| 29-08-2023 | 36.9 | 0.02 | 0 | 67 | 30 | 40.2 |  |  |  |  |  |  |  |  |  |  |  |  |  |  |  |  |  |
| 30-08-2023 | 37.9 | 0.03 | 0 | 79 | 20 | 38.1 |  |  | 0.3 |  |  |  | 44.7 |  |  |  |  |  |  |  |  |  |  |
| 31-08-2023 | 38.5 | 0.04 | 0 | 82 | 11 | 59 |  |  |  |  |  |  |  |  |  |  |  |  |  |  |  |  |  |
| 01-09-2023 | 38 | 0.05 | 0.01 | 72 | 43 | 130.9 |  |  |  |  |  |  |  |  |  |  |  |  |  |  |  |  |  |
| 02-09-2023 | 36.8 | 0.06 | 0.01 | 67 | 34 | 95.2 |  |  |  |  |  |  |  |  |  |  |  |  |  |  |  |  |  |
| 03-09-2023 | 36.7 | 0.04 | 0 | 74 | 17 | 43.8 |  |  |  |  |  |  |  |  |  |  |  |  |  |  |  |  |  |
| 05-09-2023 | 38.3 | 0.04 | 0.01 | 66 | 74 | 36.4 |  |  | 0.2 |  |  |  | 52.3 |  |  |  | 41.8 | 152 |  |  |  |  |  |
| 06-09-2023 | 36.9 | 0.08 | 0 | 83 | 45 | 64.6 |  |  | 0.1 |  |  |  | 19.7 |  |  |  |  |  |  |  |  |  |  |
| 07-09-2023 | 37 | 0.1 | 0 | 87 | 38 | 64.1 |  |  |  |  |  |  |  |  |  |  |  |  |  |  |  |  |  |
| 08-09-2023 | 36.9 | 0.17 | 0 | 87 | 22 | 68.7 |  |  |  |  |  |  |  |  |  |  |  |  |  |  |  |  |  |
| 09-09-2023 | 36.8 | 0.2 | 0.01 | 78 | 15 | 64 |  |  |  |  |  |  |  |  |  |  |  |  |  |  |  |  |  |
| 10-09-2023 | 36.9 | 0.22 | 0 | 63 | 74 | 63.2 |  |  |  |  |  |  |  |  |  |  |  |  |  |  |  |  |  |
| 11-09-2023 | 36.8 | 0.22 | 0 | 88 | 63 | 75 | 5.7 | 0.2 |  | 0.8 |  |  |  |  |  |  | 35.5 |  | 10.7 | 0.44 | 1.39 | 1.79 | 0.55 |
| 12-09-2023 | 36.7 | 0.32 | 0 | 85 | 64 | 68.9 |  |  |  |  |  |  |  |  |  |  |  |  |  |  |  |  |  |
| 13-09-2023 | 37.5 | 0.26 | 0 | 85 | 34 | 43.5 |  |  |  |  |  |  |  |  |  |  |  |  |  |  |  |  |  |
| 14-09-2023 | 38.3 | 0.25 | 0.01 | 88 | 20 | 45.6 |  |  |  |  |  |  |  |  |  |  |  |  |  |  |  |  |  |
| 15-09-2023 | 36.7 | 0.16 | 0 | 73 | 66 | 60.6 |  |  |  |  |  |  |  |  |  |  |  |  |  |  |  |  |  |
| 16-09-2023 | 36.8 | 0.24 | 0.01 | 80 | 54 | 82 |  |  |  |  |  |  |  |  |  |  |  |  |  |  |  |  |  |
| 17-09-2023 | 37.8 | 0.27 | 0 | 71 | 36 | 85.1 |  |  |  |  |  |  |  |  |  |  |  |  |  |  |  |  |  |
| 18-09-2023 | 38.4 | 0.2 | 0 | 74 | 31 | 118.1 |  |  |  |  |  |  |  |  |  |  | 39.7 | 160 | 11.6 | 0.45 | 1.77 | 2.13 | 0.6 |
| 19-09-2023 | 38.9 | 0.15 | 0.01 | 62 | 14 | 204.8 |  |  |  |  |  |  |  |  |  |  |  |  |  |  |  |  |  |
| 20-09-2023 | 39 | 0.06 | 0 | 98 | 58 | 258.5 |  |  | 0.5 |  |  |  | 685 |  |  |  |  |  |  |  |  |  |  |
| 21-09-2023 | 38.8 | 0.1 | 0.01 | 103 | 35 | 280.1 |  |  |  |  | 1.36 | 1.93 | 952.43 | 9.16 | 4.53 | 2.61 |  |  |  |  |  |  |  |
| 22-09-2023 | 39 | 0.09 | 0.01 | 100 | 33 | 268.8 |  |  |  |  |  |  |  |  |  |  |  |  |  |  |  |  |  |
| 23-09-2023 | 38.8 | 0.07 | 0 | 89 | 19 | 242.7 | 3.2 | 0.1 |  |  |  |  |  |  |  |  | 31.5 |  |  |  |  |  |  |
| 24-09-2023 | 39 | 0.14 | 0 | 88 | 10 | 237.5 |  |  |  |  |  |  |  |  |  |  |  |  |  |  |  |  |  |
| 25-09-2023 | 38 | 0.07 | 0 | 82 | 35 | 222 |  |  | 0.3 |  |  |  | 194 |  |  |  | 37.2 | 97 | 8.6 | 0.39 | 1.21 | 1.66 | 0.44 |
| 26-09-2023 | 38.4 | 0.09 | 0 | 76 | 57 | 192.7 |  |  |  |  |  |  |  |  |  |  |  |  |  |  |  |  |  |
| 27-09-2023 | 38.4 | 0.09 | 0 | 79 | 45 | 171.7 |  |  |  |  |  |  |  |  |  |  |  |  |  |  |  |  |  |
| 28-09-2023 | 38.4 | 0.16 | 0 | 74 | 43 | 155.1 |  |  | 0.2 |  |  |  | 74.3 |  |  |  | 39.8 |  |  |  |  |  |  |
| 29-09-2023 | 37.9 | 0.14 | 0.01 | 76 | 72 | 137.3 |  |  |  |  |  |  |  |  |  |  |  |  |  |  |  |  |  |
| 30-09-2023 | 38 | 0.15 | 0.01 | 69 | 48 | 134 |  |  |  |  |  |  |  |  |  |  | 39.2 | 107 | 12.7 | 0.66 | 1.89 | 2.06 | 0.59 |
| 01-10-2023 | 38.4 | 0.14 | 0 | 89 | 32 | 138.6 |  |  |  |  |  |  |  |  |  |  |  |  |  |  |  |  |  |
| 02-10-2023 | 37.8 | 0.18 | 0.01 | 66 | 19 | 140.3 |  |  |  | 3.1 |  |  |  |  |  |  | 35.3 |  |  |  |  |  |  |
| 03-10-2023 | 37 | 0.14 | 0.02 | 95 | 49 | 145.5 |  |  |  |  |  |  |  |  |  |  |  |  |  |  |  |  |  |
| 04-10-2023 | 36.8 | 0.11 | 0 | 86 | 75 | 135.9 |  |  |  |  |  |  |  |  |  |  |  |  |  |  |  |  |  |
| 06-10-2023 | 36.6 | 0.15 | 0.04 | 90 | 50 | 117.1 |  |  |  |  |  |  |  |  |  |  |  |  |  |  |  |  |  |
| 07-10-2023 | 36.8 | 0.11 | 0.01 | 89 | 30 | 112.3 |  |  |  |  |  |  |  |  |  |  |  |  |  |  |  |  |  |
| 08-10-2023 | 36.9 | 0.19 | 0.01 | 83 | 72 | 113.6 |  |  |  |  |  |  |  |  |  |  | 39.9 | 123 | 12 | 0.48 | 2.07 | 1.95 | 0.59 |
| 09-10-2023 | 36.8 | 0.21 | 0 | 82 | 63 | 140.9 |  |  |  |  |  |  |  |  |  |  |  |  |  |  |  |  |  |
| 10-10-2023 | 36.7 | 0.17 | 0.04 | 79 | 40 | 156.7 |  |  |  |  |  |  |  |  |  |  |  |  |  |  |  |  |  |
| 11-10-2023 | 36.8 | 0.14 | 0.01 | 75 | 23 | 171.9 | 1.3 | 0.1 |  |  |  |  |  |  |  |  |  |  |  |  |  |  |  |
| 12-10-2023 | 36.8 | 0.16 | 0.01 | 71 | 86 | 141.6 |  |  |  |  |  |  |  |  |  |  |  |  |  |  |  |  |  |
| 13-10-2023 | 36.8 | 0.13 | 0.01 | 88 | 60 | 129.6 |  |  |  |  |  |  |  |  |  |  |  |  |  |  |  |  |  |
| 14-10-2023 | 37 | 0.14 | 0 | 92 | 50 | 124.2 |  |  |  |  |  |  |  |  |  |  |  |  |  |  |  |  |  |
| 15-10-2023 | 36.7 | 0.14 | 0.01 | 88 | 37 | 109.2 | 1.8 | 0.1 |  |  |  |  |  |  |  |  |  |  |  |  |  |  |  |
| 16-10-2023 | 36.7 | 0.2 | 0 | 86 | 28 | 94.2 |  |  |  |  |  |  |  |  |  |  | 35.7 | 110 | 12 | 0.48 | 2.19 | 1.86 | 0.58 |
| 18-10-2023 | 36.4 | 0.15 | 0.01 | 73 | 64 | 101 |  |  |  |  |  |  |  |  |  |  |  |  |  |  |  |  |  |
| 19-10-2023 | 36.6 | 0.16 | 0.01 | 64 | 38 | 108.1 |  |  |  |  |  |  |  |  |  |  |  |  |  |  |  |  |  |
| 20-10-2023 | 36.5 | 0.12 | 0.01 | 82 | 35 | 116.9 |  |  |  |  |  |  |  |  |  |  |  |  |  |  |  |  |  |
| 21-10-2023 | 37.6 | 0.15 | 0.01 | 87 | 61 | 139 |  |  |  |  |  |  |  |  |  |  |  |  |  |  |  |  |  |
| 22-10-2023 | 37.6 | 0.24 | 0.01 | 85 | 61 | 151.5 |  |  | 0.1 |  |  |  | 89.9 |  |  |  |  |  |  |  |  |  |  |
| 23-10-2023 | 38 | 0.13 | 0.01 | 79 | 32 | 147.9 |  |  |  |  |  |  |  |  |  |  |  |  |  |  |  |  |  |
| 24-10-2023 | 38.2 | 0.1 | 0.01 | 76 | 106 | 152.6 |  |  |  |  |  |  |  |  |  |  |  |  |  |  |  |  |  |
| 25-10-2023 | 38 | 0.13 | 0.01 | 74 | 72 | 140.8 |  |  |  |  |  |  |  |  |  |  |  |  |  |  |  |  |  |
| 26-10-2023 | 38 | 0.14 | 0.02 | 80 | 59 | 146.8 |  |  |  |  |  |  |  |  |  |  |  |  |  |  |  |  |  |
| 27-10-2023 | 38 | 0.18 | 0.02 | 78 | 48 | 130.9 |  |  | 0.1 |  |  |  | 56.8 |  |  |  | 38.2 | 152 | 12.4 | 0.41 | 2.06 | 2.09 | 0.58 |
| 28-10-2023 | 37.5 | 0.13 | 0.02 | 65 | 20 | 115.5 |  |  |  |  |  |  |  |  |  |  |  |  |  |  |  |  |  |
| 29-10-2023 | 38.4 | 0.19 | 0.03 | 77 | 65 | 104.1 |  |  |  |  |  |  |  |  |  |  |  |  |  |  |  |  |  |
| 30-10-2023 | 37.8 | 0.22 | 0.02 | 94 | 60 | 150.7 |  |  |  |  |  |  |  |  |  |  |  |  |  |  |  |  |  |
| 31-10-2023 | 36.8 | 0.12 | 0.01 | 82 | 46 | 140.4 |  |  |  |  |  |  |  |  |  |  |  |  |  |  |  |  |  |
| 01-11-2023 | 37.2 | 0.1 | 0.01 | 77 | 28 | 124.4 |  |  |  |  |  |  |  |  |  |  |  |  |  |  |  |  |  |
| 02-11-2023 | 36.7 | 0.14 | 0.02 | 75 | 90 | 94.8 |  |  |  |  |  |  |  |  |  |  |  |  |  |  |  |  |  |
| 03-11-2023 | 37 | 0.14 | 0.02 | 81 | 87 | 88.9 |  |  |  |  |  |  |  |  |  |  |  |  |  |  |  |  |  |
| 04-11-2023 | 36.9 | 0.14 | 0.03 | 79 | 69 | 79.3 |  |  |  |  |  |  |  |  |  |  |  |  |  |  |  |  |  |
| 05-11-2023 | 36.9 | 0.14 | 0.02 | 74 | 36 | 82.5 |  |  |  |  |  |  |  |  |  |  |  |  |  |  |  |  |  |
| 06-11-2023 | 36.9 | 0.1 | 0.03 | 61 | 20 | 69.5 |  |  |  |  |  |  |  |  |  |  |  |  |  |  |  |  |  |
| 07-11-2023 | 36.5 | 0.13 | 0.03 | 81 | 13 | 57.6 |  |  |  |  |  |  |  |  |  |  |  |  |  |  |  |  |  |
| 08-11-2023 | 36.8 | 0.13 | 0.03 | 83 | 94 | 51.3 |  |  |  |  |  |  |  |  |  |  |  |  |  |  |  |  |  |
| 09-11-2023 | 36.8 | 0.15 | 0.02 | 77 | 54 | 39.2 |  |  |  |  |  |  |  |  |  |  |  |  |  |  |  |  |  |
| 10-11-2023 | 36.9 | 0.13 | 0.02 | 75 | 43 | 35.2 |  |  |  |  |  |  |  |  |  |  |  |  |  |  |  |  |  |
| 16-11-2023 |  | 0.3 | 0.06 | 101 | 23 | 95.9 |  |  |  |  |  |  |  |  |  |  |  |  |  |  |  |  |  |
| 17-11-2023 |  | 0.1 | 0.03 | 89 | 10 | 66.1 |  |  |  |  |  |  |  |  |  |  |  |  |  |  |  |  |  |
| 18-11-2023 |  | 0.16 | 0.05 | 87 | 57 | 45.2 |  |  |  |  |  |  |  |  |  |  |  |  |  |  |  |  |  |
| 19-11-2023 |  | 0.23 | 0.04 | 82 | 36 | 35.8 |  |  |  |  |  |  |  |  |  |  |  |  |  |  |  |  |  |
| 20-11-2023 |  | 0.28 | 0.06 | 86 | 33 | 34.3 |  |  |  |  |  |  |  |  |  |  |  |  |  |  |  |  |  |
| 21-11-2023 |  | 0.33 | 0.05 | 79 | 29 | 29.3 |  |  |  |  |  |  |  |  |  |  |  |  |  |  |  |  |  |
| 22-11-2023 |  | 0.24 | 0.05 | 73 | 15 | 16.6 | 6 | 0.2 |  |  |  |  |  |  |  |  |  |  |  |  |  |  |  |
| 23-11-2023 |  | 0.21 | 0.05 | 73 | 78 | 10.2 |  |  |  |  |  |  |  |  |  |  |  |  |  |  |  |  |  |
| 24-11-2023 |  | 0.23 | 0.07 | 76 | 63 | 9.6 | BM |  |  |  |  |  |  |  |  |  |  |  |  |  |  |  |  |
| 28-11-2023 |  | 0.33 | 0.07 | 97 | 27 | 4.1 |  |  |  |  |  |  |  |  |  |  |  |  |  |  |  |  |  |
| 29-11-2023 |  | 0.24 | 0.08 | 98 | 15 | 3 |  |  |  |  |  |  |  |  |  |  |  |  |  |  |  |  |  |
| 30-11-2023 |  | 0.32 | 0.19 | 90 | 48 | 2.9 | BM |  |  |  |  |  |  |  |  |  |  |  |  |  |  |  |  |
| 02-12-2023 |  | 0.27 | 0.08 | 90 | 25 | 1.2 | 12.9 | 0.4 |  |  |  |  |  |  |  |  |  |  |  |  |  |  |  |
| 03-12-2023 |  | 0.32 | 0.14 | 89 | 21 | 3.6 |  |  |  |  |  |  |  |  |  |  |  |  |  |  |  |  |  |
| 04-12-2023 |  | 0.36 | 0.18 | 92 | 94 | 13.1 |  |  |  |  |  |  |  |  |  |  |  |  |  |  |  |  |  |
| 05-12-2023 |  | 0.33 | 0.12 | 88 | 66 | 21.3 |  |  | 0.03 |  |  |  |  |  |  |  | 44.2 |  |  |  |  |  |  |
| 07-12-2023 |  | 0.26 | 0.13 | 80 | 28 | 69.2 |  |  |  |  |  |  |  |  |  |  |  |  |  |  |  |  |  |
| 08-12-2023 |  | 0.35 | 0.18 | 83 | 102 | 85.9 |  |  |  |  |  |  |  |  |  |  |  |  |  |  |  |  |  |
| 09-12-2023 |  | 0.34 | 0.15 | 75 | 59 | 61 |  |  |  |  |  |  |  |  |  |  |  |  |  |  |  |  |  |

Note : Tmax: Maximum Temperature; WBC: White Blood Cell count; Neutrophils: Neutrophil count; Hb: Hemoglobin; PLT: Platelet count; CRP: C-reactive Protein Ret: Reticulocyte count; Ret%: Reticulocyte percentage; PCT: Procalcitonin; LAC: Lactate; IL-2: Interleukin-2; IL-4: Interleukin-4; IL-6: Interleukin-6; IL-10: Interleukin-10; TNF-a: Tumor Necrosis Factor-alpha; IFN-r: Interferon-gamma; PRO: Protein; LDH: Lactate Dehydrogenase; IgG: Immunoglobulin G; IgM: Immunoglobulin M; IgA: Immunoglobulin A; C3: Complement component 3; C4: Complement component 4

**Table S2: Antimicrobial susceptibility of the strains recovered from different specimens**

| Date | Specimens | TGC | CIP | LVX | AMK | TOB | IPM | MEM | ATM | FEP | CAZ | CZA | TCC | CSL |
| --- | --- | --- | --- | --- | --- | --- | --- | --- | --- | --- | --- | --- | --- | --- |
| 19-09-2023 | PICC catheter blood | ＞＝8 | 1 | 4 | ＜＝2 | ＜＝1 | 26 | ＞＝16 | 16 | 8 | 8 | 22 | ＞＝128 | 32 |
| 20-09-2023 | Peripheral blood | ＞＝8 | 0.5 | 4 | ＜＝2 | ＜＝1 | 2 | ＞＝16 | 16 | 8 | 2 | 22 | ＞＝128 | 32 |
| 20-09-2023 | PICC catheter blood | ＞＝8 | 2 | ＞＝8 | ＜＝2 | ＜＝1 | 2 | ＞＝16 | N/D | 8 | 2 |  | ＞＝128 | 32 |
| 02-10-2023 | Faecal | N/D | 0.5 | 4 | ＜＝2 | ＜＝1 | 2 | ＞＝16 | N/D | 8 | 2 |  | ＞＝128 | 32 |

Note: TGC: Tigecycline; CIP: Ciprofloxacin; LVX: Levofloxacin; AMK: Amikacin; TOB: Tobramycin; IPM: Imipenem; MEM: Meropenem; ATM: Aztreonam; FEP: Cefepime; CAZ: Ceftazidime; CZA: Ceftazidime-Avibactam; TCC: Ticarcillin-Clavulanic Acid; CSL: Colistin; PICC: Peripherally Inserted Central Catheter.

**Table S3: Timeline of Antibiotic Therapy and Adjustments for Patient Management**

| **Date** | **Symptoms / Conditions** | **Antibiotic Treatments** |
| --- | --- | --- |
| 11-08-2023 | Admission | - |
| 12-08-2023 | Prophylaxis | Compound sulfamethoxazole (25 mg/kg/day, BID, 3 days on, 4 days off) |
| 16-08-2023 | Fever | CSSS (1.5 g Q8h) |
| 17-08-2023 | Septic shock | Meropenem (0.8 g Q8h), Vancomycin (0.42 g Q8h) |
| 18-08-2023 |  | Meropenem (0.8 g Q8h), Vancomycin (0.42 g Q8h), Posaconazole (TID) |
| 19-08-2023 |  | Meropenem (0.8 g Q8h), Vancomycin (0.42 g Q8h), Posaconazole (TID) |
| 20-08-2023 |  | CSSS (3 g Q8h), Meropenem (0.8 g Q8h), Vancomycin (0.42 g Q8h), Posaconazole (TID) |
| 28-08-2023 | Perianal dermatitis | CSSS (1.5 g Q8h), Linezolid (PO), Posaconazole (TID) |
| 01-09-2023 | Fever, diarrhoea | CSSS (3 g Q8h), Vancomycin (0.4 g Q6h), Ceftazidime (2 g Q12h), Linezolid (PO), Posaconazole (TID) |
| 10-09-2023 | Diarrhea | Meropenem (0.76 g Q8h), Vancomycin (0.4 g Q6h), Ceftazidime (2 g Q12h), Linezolid (PO), Voriconazole (300 mg Q12h) |
| 01-10-2023 | Fever | Vancomycin (0.4 g Q6h), Amikacin (0.6 g Qd), Cefepime (1.9 g Q8h), IPM/CS (0.5 g Q6h), Voriconazole (260 mg Q12h) |
| 01-11-2023 | Discharge | Oral: Compound sulfamethoxazole, Voriconazole, Metronidazole, Levofloxacin |
| 16-11-2023 | Admission | CSSS (2.64 g Q8h), Continue oral: Compound sulfamethoxazole, Voriconazole, Metronidazole, Levofloxacin |
| 05-12-2023 | Headache, runny nose, cough | Ceftazidime (1.65 g Q8h) |
| 06-12-2023 | H3N2 Flu | Oseltamivir, Ceftazidime (1.7 g Q12h) |
| 08-12-2023 |  | Ceftazidime (1.7 g Q13h), IPM/CS (0.5 g Q6h) |
